# Supplementary material for: F13A1 Gene Variant (V34L) and Residual Circulating FXIIIA Levels Predict Short- and Long-Term Mortality in Acute Myocardial Infarction after Coronary Angioplasty
Source: PubMed Central journal article supplement (PMC6165350; doi:10.3390/ijms19092766), 2018-09-14
Supplement: ijms-19-02766-s001.pdf [file ijms-19-02766-s001.pdf]

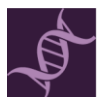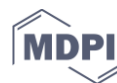

1 Supplementary Table 1. Laboratory and clinical features of patients according to presence (MACE+) or absence (MACE-) of major adverse cardiovascular events.

| Laboratory and angiographic data                | Whole population<br>(n=333) |             |                   | L34-carriers<br>(n=126, 37.8%) |             |                   | VV34 homozygotes<br>(n=207, 62.2%) |             |                   |
|-------------------------------------------------|-----------------------------|-------------|-------------------|--------------------------------|-------------|-------------------|------------------------------------|-------------|-------------------|
|                                                 | MACE +                      | MACE -      | P                 | MACE +                         | MACE -      | P                 | MACE +                             | MACE -      | P                 |
| <b>Creatinine basal value</b> (mg/dl, mean ±SD) | 1.46 ±1.4                   | 0.96 ±0.4   | <b>&lt;0.0001</b> | 1.4 ±0.9                       | 0.9 ±0.2    | <b>0.0001</b>     | 1.5±1.7                            | 1.0 ±0.4    | <b>0.0011</b>     |
| <b>Creatinine peak value</b> (mg/dl, mean ±SD)  | 1.84 ±1.7                   | 1.1 ±1.0    | <b>&lt;0.0001</b> | 1.9 ±1.6                       | 1.0 ±0.3    | <b>&lt;0.0001</b> | 1.8±1.9                            | 1.1 ±0.8    | <b>0.0018</b>     |
| <b>Total Cholesterol</b> (mg/dl, mean ±SD)      | 169.0 ±41.4                 | 195.6 ±42.6 | <b>&lt;0.0001</b> | 171.5 ±43.6                    | 185.7 ±42.6 | n.s               | 168.6±41.2                         | 201.2 ±47.8 | <b>&lt;0.0001</b> |
| <b>HDL</b> (mg/dl, mean ±SD)                    | 44.7 ±14.6                  | 46.5 ±12.5  | n.s.              | 45.0 ±12.9                     | 44.9 ±11.3  | n.s               | 44.5 ±15.7                         | 45.9 ±12.0  | n.s               |
| <b>LDL</b> (mg/dl, mean ±SD)                    | 99.4 ±34.7                  | 122.8 ±42.3 | <b>&lt;0.0001</b> | 102.3 ±38.4                    | 115.2 ±38.3 | n.s               | 98.7 ±33.8                         | 127.1 ±48.0 | <b>0.0002</b>     |
| <b>Triglycerides</b> (mg/dl, mean ±SD)          | 124.5 ±61.6                 | 136.1 ±69.9 | n.s.              | 121.2 ±56.7                    | 127.6 ±59.4 | n.s               | 126.8 ±64.7                        | 141.3 ±75.9 | n.s               |
| <b>Glycated hemoglobin</b> (% , mean ±SD)       | 6.6 ±1.4                    | 6.3 ±1.2    | <b>0.014</b>      | 6.6 ±1.2                       | 6.2 ±1.0    | n.s               | 6.7±1.5                            | 6.3±1.2     | n.s               |
| <b>Uric acid</b> (mg/dl, mean ±SD)              | 6.2 ±1.9                    | 5.91 ±1.74  | n.s               | 6.1 ±1.9                       | 5.6 ±1.7    | n.s               | 6.2±1.9                            | 5.9±1.6     | n.s               |
| <b>CAD extent</b>                               |                             |             |                   |                                |             |                   |                                    |             |                   |
| <b>Single-vessel disease</b>                    | 30.4                        | 42.7        | <b>0.03</b>       | 32                             | 47          | <b>0.0498</b>     | 29                                 | 40          | n.s               |
| <b>Double-vessel disease</b>                    | 31.3                        | 29.4        | n.s               | 27                             | 28          | n.s               | 34                                 | 30          | n.s               |
| <b>Triple-vessel disease</b>                    | 38.3                        | 28.4        | n.s               | 41                             | 25          | n.s               | 37                                 | 30          | n.s               |
| <b>N° of stent</b>                              |                             |             |                   |                                |             |                   |                                    |             |                   |
| <b>0</b>                                        | 20.0                        | 25.8        | n.s               | 11                             | 18          | n.s               | 26                                 | 21          | n.s               |
| <b>1</b>                                        | 42.6                        | 45.0        | n.s               | 47                             | 51          | n.s               | 40                                 | 50          | n.s               |
| <b>2</b>                                        | 23.5                        | 21.5        | n.s               | 26                             | 23          | n.s               | 21                                 | 21          | n.s               |
| <b>3</b>                                        | 6.1                         | 3.6         | <b>0.0001</b>     | 5                              | 5           | n.s               | 7                                  | 3           | n.s               |
| <b>4 or more</b>                                | 7.8                         | 4.0         | n.s               | 10                             | 3           | n.s               | 6                                  | 5           | n.s               |
| <b>Type of stent</b>                            |                             |             |                   |                                |             |                   |                                    |             |                   |
| <b>BMS</b>                                      | 45.2                        | 33.9        | <b>0.05</b>       | 55                             | 36          | <b>0.0333</b>     | 39                                 | 33          | n.s               |
| <b>DES</b>                                      | 36.5                        | 44.9        | n.s               | 37                             | 46          | n.s               | 37                                 | 45          | n.s               |
| <b>POBA</b>                                     | 17.4                        | 20.2        | n.s               | 8                              | 18          | n.s               | 24                                 | 22          | n.s               |

2 CAD = coronary artery disease; BMS = bare metal stent; DES = drug eluting stent; POBA = percutaneous only balloon angioplasty; n.s., indicates not significant.
